# Supplementary material
Source: Springer Nature journal article supplement (https://www.springerprofessional.de/resource/supplementary/13638_2012_544_MOESM16_ESM.pdf/11898030)

Phase PDF Plots

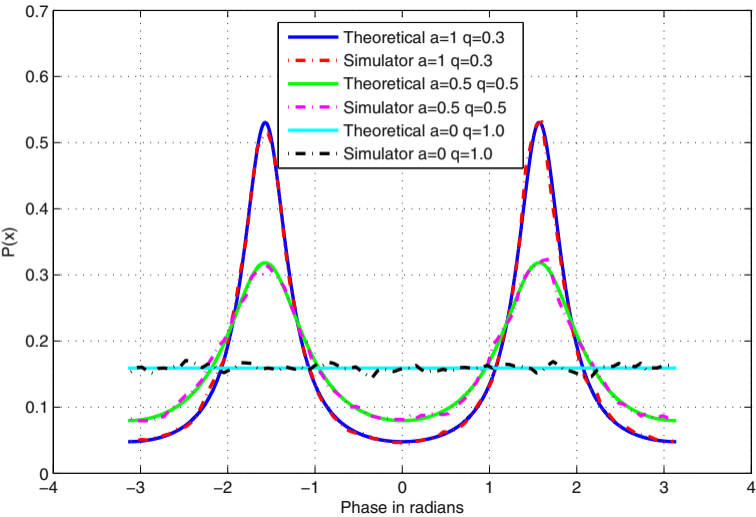

Supplement: MOESM16 [file 11898030]
